# Supplementary material for: Keap1-Kelch-targeting protein–protein interaction inhibitors, but not reversibly-binding electrophiles, increase the thermostability of Keap1 in the cellular environment
Source: Royal Society of Chemistry journal article supplement (doi:10.1039/d6cb00045b), 2026-04-07

## Supplementary Information

### **Keap1-Kelch-targeting protein-protein interaction inhibitors, but not reversibly-binding electrophiles, increase the thermostability of Keap1 in the cellular environment**

Sharadha Dayalan Naidu, Dina Dikovskaya, Jasmine M. Walker, Charlotte Lim Jia Yee, Annamarie J. Cafferkey, Manaka Tatsuno, Jialin Feng, Terry W. Moore, Tatum Johnson, Tadashi Honda, Geoff Wells, Takafumi Suzuki, Masayuki Yamamoto, Albena T. Dinkova-Kostova

**Raw images of the immunoblots shown in Figure 7**



Figure 7D

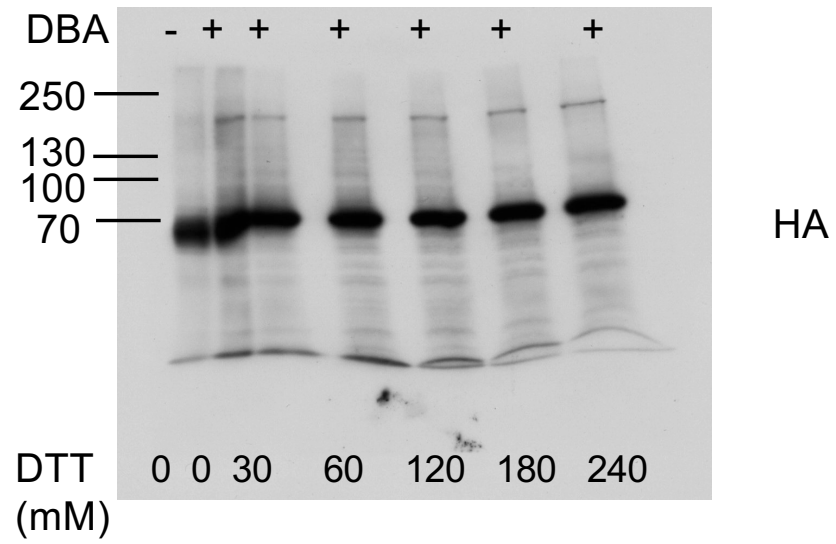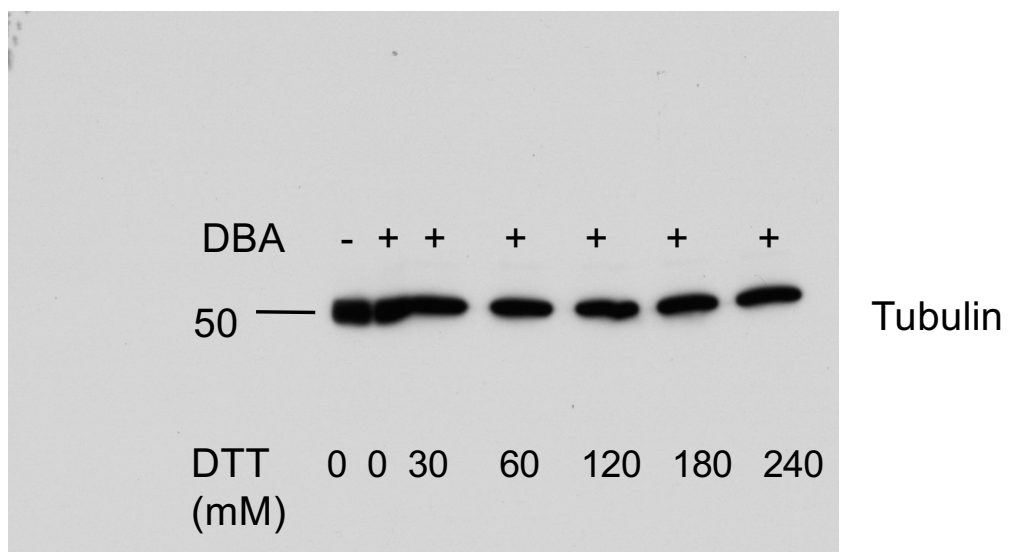

Supplement: d6cb00045b1.pdf [file d6cb00045b1.pdf]
